# Supplementary material for: Zeolitic imidazolate framework-8 encapsulated with Mo-based polyoxometalates as surfaces with antibacterial activity against Escherichia coli
Source: Royal Society of Chemistry journal article supplement (doi:10.1039/d4na00142g), 2024-01-01
Supplement: d4na00142g1.pdf [file d4na00142g1.pdf]

## Supporting Information

### Zeolitic Imidazolate Framework-8 Encapsulated with Mo-Based Polyoxometalates as Surfaces with Antibacterial Activity Against Escherichia Coli

Mariam M. Abdelkhalek <sup>1</sup>, Aya M. Mohamed <sup>2</sup>, Rehab Z. Abdallah <sup>3</sup>, Ghada E. Khedr <sup>4</sup>, Rania Siam <sup>3</sup>, Nageh K. Allam <sup>1,\*</sup>

<sup>1</sup> Energy Materials Laboratory, Physics Department, School of Sciences and Engineering, The American University in Cairo, New Cairo 11835, Egypt

<sup>2</sup> Department of Chemistry, Faculty of Science, Cairo University, Cairo 12613, Egypt

<sup>3</sup> Department of Biology, School of Sciences and Engineering, The American University in Cairo, New Cairo 11835, Egypt

<sup>4</sup> Department of Analysis and Evaluation, Egyptian Petroleum Research Institute, Cairo 11727, Egypt

\* Corresponding Author email: [nageh.allam@aucegypt.edu](mailto:nageh.allam@aucegypt.edu)

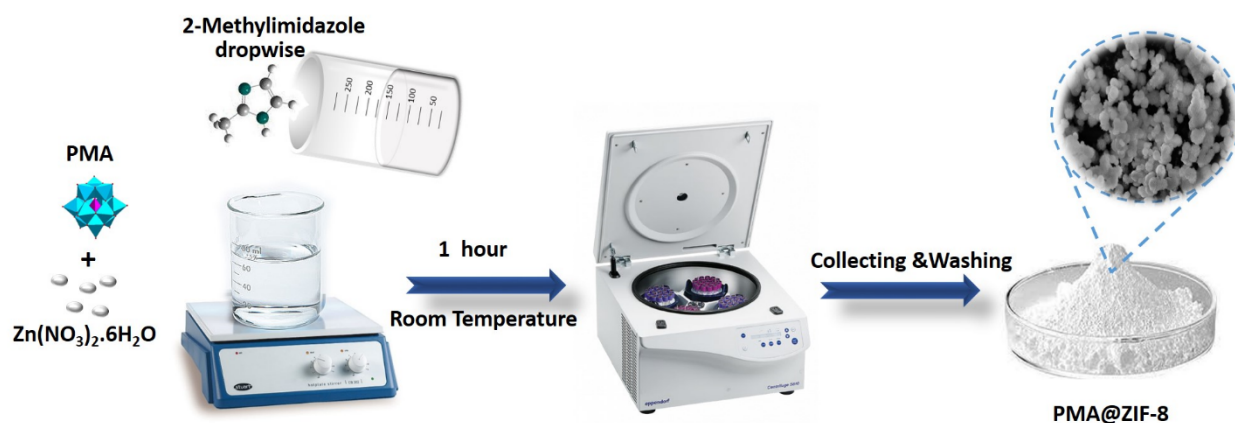

**Scheme S1.** Schematic presentation of the steps of PMA@ZIF-8 synthesis
